# Supplementary material for: Construction of 3D Cellular Composites with Stem Cells Derived from Adipose Tissue and Endothelial Cells by Use of Optical Tweezers in a Natural Polymer Solution
Source: MDPI journal article supplement (doi:10.3390/ma12111759), 2019-05-30
Supplement: s1 [file s1]

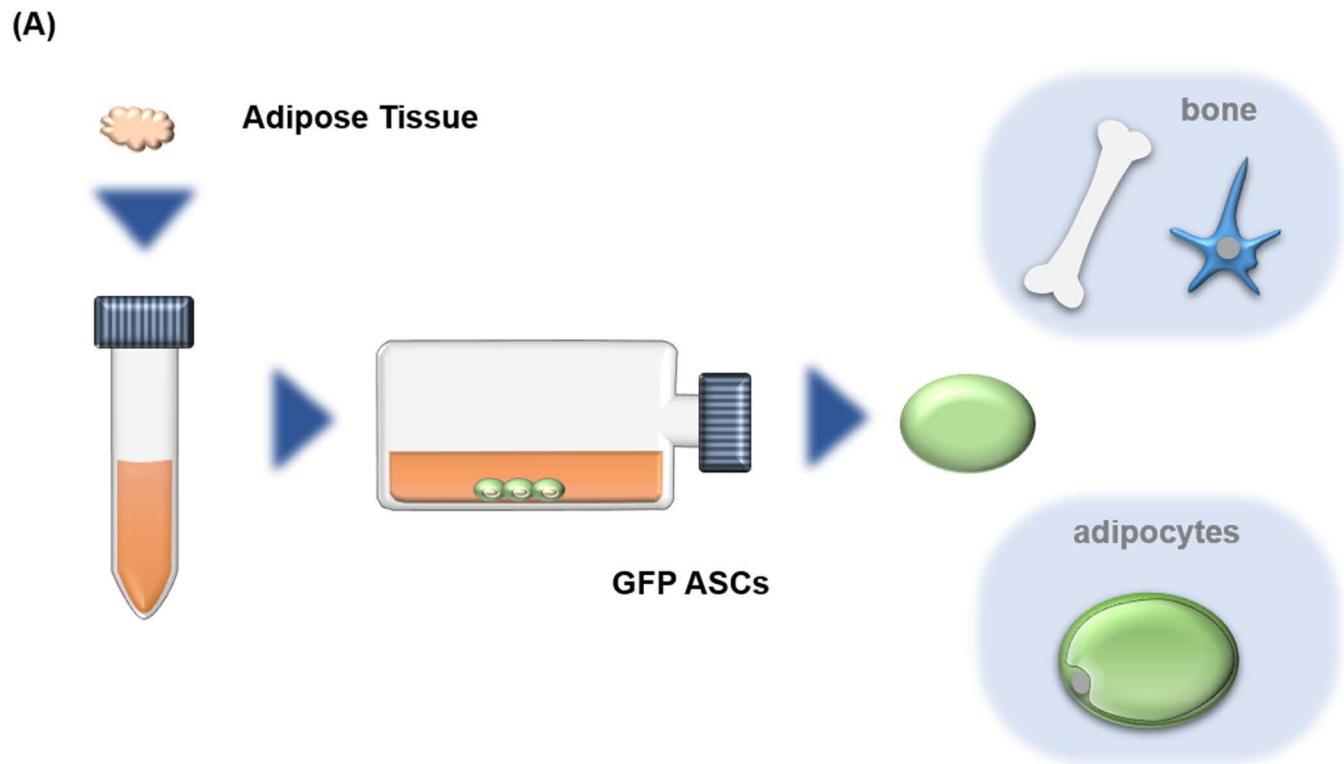

(B)

Oil Red O staining

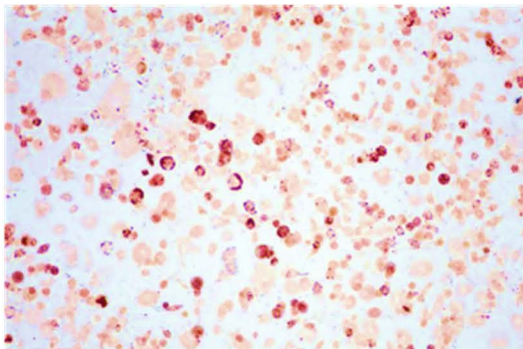

200µm

(C)

Alizarin red staining

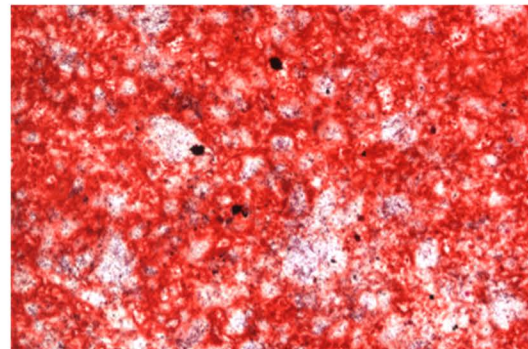

200µm

**Figure S1. Multi lineage potential of mouse ASCs (GFP)** Mouse ASCs were cultured for 3 weeks in the appropriate induction media to evaluate their ability to differentiate (A). The cells were analyzed for (B) adipogenic (Oil red-O) and (C) osteogenic (alizarin red S) differentiation capacity.
